# Supplementary material for: Immunotherapy of patient with hepatocellular carcinoma using cytotoxic T lymphocytes ex vivo activated with tumor antigen-pulsed dendritic cells
Source: PubMed Central journal article supplement — J Cancer. 2018 Jan 1;9(2):275–87. doi: 10.7150/jca.22176 (PMC5771335; doi:10.7150/jca.22176), 2018-01-01
Supplement: jcav09p0275s1.pdf [file jcav09p0275s1.pdf]

**Supplementary Table S1 The sequences of TP53, Survivin, and hTERT**

|                                                                                                                                                                                                                                                                                                                                                                                                                                                                                                                                                                                                                                                                                                                                                                                                                                                                                                                                                                                                                                                                                                                                                                                                                                                                                                                                       |
|---------------------------------------------------------------------------------------------------------------------------------------------------------------------------------------------------------------------------------------------------------------------------------------------------------------------------------------------------------------------------------------------------------------------------------------------------------------------------------------------------------------------------------------------------------------------------------------------------------------------------------------------------------------------------------------------------------------------------------------------------------------------------------------------------------------------------------------------------------------------------------------------------------------------------------------------------------------------------------------------------------------------------------------------------------------------------------------------------------------------------------------------------------------------------------------------------------------------------------------------------------------------------------------------------------------------------------------|
| <p><b>P53</b></p>                                                                                                                                                                                                                                                                                                                                                                                                                                                                                                                                                                                                                                                                                                                                                                                                                                                                                                                                                                                                                                                                                                                                                                                                                                                                                                                     |
| <p><b>DNA sequence:</b></p> <p>ATGGAGGAGCCGAGTCAGATCCTAGCGTCGAGCCCCCTCTGAGTCAGGAAACATTTTCAGACCTATGGAAACTACTTCCTGA<br/> AAACAACGTTCTGTCCCCCTTCCCGTCCCAAGCAATGGATGATTTGATGCTGTCCCGGACGATATTGAACAATGGTTCACTG<br/> AAGACCCAGGTCCAGATGAAGCTCCAGAATGCCAGAGGCTGCTCCCCGCGTGGCCCCGCACCAGCAGCTCCTACACCGGCG<br/> GCCCTGCACCAGCCCCCTCCTGGCCCCGTGTCATCTTCTGTCCCTTCCCAGAAAACCTACCAGGGCAGCTACGGTTTTCCGTCT<br/> GGGTTCTTGCACTTCTGGGACAGCAAGTCTGTGACTTGCACGTAATCCCCTGCCCTCAACAAGATGTTTTGCCAACTGGCCA<br/> AGACCTGCCCTGTGCAGCTGTGGGTTGATTCCACACCCCCGCGCCGACCCGCGTCCGCGCCATGGCCATCTACAAGCAGTCA<br/> CAGCACATGACGGAGGTTGTGAGGCGCTGCCCCACCATGAGCGCTGCTCAGATAGCGATGGTCTGGCCCCCTCCTCAGCATCT<br/> TATCCGAGTGAAGTAAATTTGCGTGTGGAGTATTGGATGACAGAAACACTTTTCGACATAGTGTGGTGGTGCCTATGAGC<br/> CGCCTGAGGTTGGCTCTGACTGTACCACCATCCACTACAACATACATGTGTAACAGTTCCCTGCATGGGCGGCATGAACCGGAGG<br/> CCCATCCTCACCATCATCACACTGGAAGACTCCAGTGGTAATCTACTGGGACGGAACAGCTTTGAGGTGCGTGTGTTGTCCTG<br/> TCCTGGGAGAGACCGGCGCACAGAGGAAGAGAATCTCCGCAAGAAAGGGGAGCCTCACCACGAGCTGCCCCAGGGAGCACTA<br/> AGCGAGCACTGCCAACAAACACCAGCTCCTCTCCCAGCCAAAGAAGAAACCACTGGATGGAGAATATTTACCCTTCAGATC<br/> CGTGGGCGTGAGCGTTCGAGATGTTCCGAGAGCTGAATGAGGCCTTGAAGTCAAGGATGCCAGGCTGGGAAGGAGCCAGG<br/> GGGAGCAGGGCTCACTCCAGCCACCTGAAGTCCAAAAAGGGTCAGTCTACCTCCCGCCATAAAAAACTCATGTTCAAGACAG<br/> AAGGGCCTGACTCAGAC</p> |
| <p><b>Amino Acid Sequence:</b></p> <p>MEEPQSDPSVEPLSQETFSDLWKLLPENNVLSPPLSQAMDDLMLSPDDIEQWFTEDPGPDEAPRMPPEAAPRVAPAPAAPTPA<br/> APAPAPSWPLSSSVPSQKTYQGSYGFRLGFLHSGTAKSVTCTYSPALNKMFCQLAKTQCPVQLWVDSTPPPGTRVRAMAIYKQS<br/> QHMTEVRRCPHHERCSDSDGLAPPQHLIRVEVNLRVEYLDDRNTFRHSVVVPYEPPEVGSDDTIIHYNMNCSSCMGMNRR<br/> PILTIITLEDSSGNLLGRNSFEVRVCACPGRRRTEENLRKKGEPHHELPPGSTKRALPNNTSSSPQPKKPLDGEYFTLQI<br/> RGRERFEMFRELNEALELKDQAQAGKEPGGSRAHSSHLKSKKGQTSRHKLMFKTEGPDS</p>                                                                                                                                                                                                                                                                                                                                                                                                                                                                                                                                                                                                                                                                                                                                                                                                                                                                  |
| <p><b>Survivin</b></p>                                                                                                                                                                                                                                                                                                                                                                                                                                                                                                                                                                                                                                                                                                                                                                                                                                                                                                                                                                                                                                                                                                                                                                                                                                                                                                                |
| <p><b>DNA sequence:</b></p> <p>ATGGGTGCCCCGACGTTGCCCTGCCTGGCAGCCCTTTCTCAAGGACCACCGCATCTCTACATTCAAGAAGTGGCCCTTCTT<br/> GGAGGGCTGCGCTGCACCCCGAGCGGATGGCCGAGGCTGGCTTCCACTGCCCCACTGAGAACGAGCCAGACTGGCCC<br/> AGTGTCTTCTGCTTCAAGGAGCTGGAAGGCTGGGAGCCAGATGACGACCCCATAGAGGAACATAAAAAGCATTGTCGGGT<br/> TGCGCTTCTCTTCTGCAAGAAGCAGTTGAAGAATTAACCCTTGGTGAATTTTGAAGTGGACAGAGAAAGCCAAAGAA<br/> CAAAATTGCAAAGAAACCAACAATAAGAAGAAAGAAATTTGAGGAACTGCGAAGAAAGTGCGCCGTGCCATCGAGCAGCTGG<br/> CTGCCATGGAT</p>                                                                                                                                                                                                                                                                                                                                                                                                                                                                                                                                                                                                                                                                                                                                                                                                                                             |
| <p><b>Amino Acid Sequence:</b></p> <p>MGAPTLPPAWQPFKLDHRISTFKNWPFLEGCACTPERMAEAGFIHCPTENEPDLAQCFFCFKELEGWEPDDDPIDEEHKKHSSG<br/> CAFLSVKKQFEELTLGEFLKLDREERAKNKIAKETNKKKEFEETAKKVRRAIEQLAAMD</p>                                                                                                                                                                                                                                                                                                                                                                                                                                                                                                                                                                                                                                                                                                                                                                                                                                                                                                                                                                                                                                                                                                                                       |
| <p><b>hTERT</b></p>                                                                                                                                                                                                                                                                                                                                                                                                                                                                                                                                                                                                                                                                                                                                                                                                                                                                                                                                                                                                                                                                                                                                                                                                                                                                                                                   |
| <p><b>DNA sequence:</b></p> <p>ATGCCGCGCGCTCCCCGCTGCCGAGCCGTGCGCTCCCTGCTGCGCAGCCACTACCGCGAGGTGCTGCCGCTGGCCACGTTTCGT<br/> CGCGCGCTGGGGCCCGAGGCTGGCGGCTGGTGCAGCGGGGACCCGCGGCTTTCCGCGCGCTGGTGGCCAGTGCCTGG</p>                                                                                                                                                                                                                                                                                                                                                                                                                                                                                                                                                                                                                                                                                                                                                                                                                                                                                                                                                                                                                                                                                                                            |

TGTGCGTGCCCTGGGACGCACGGCCGCCCCCGCCGCCCTCTCCGCCAGGTGTCCTGCTGAAGGAGCTGGTGGCCGA  
GTGCTGCAGAGGCTGTGCGAGCGCGGCCGAAGAACGTGCTGGCCTTCGGCTTCGCGCTGCTGGACGGGGCCCGGGGGCC  
CCCCGAGGCCCTTACCACCAGCGTGCAGCTACCTGCCAACACGGTGACCGACGCACTGCGGGGAGCGGGGCGTGGGGG  
TGCTGCTGCGCCGCTGGGCGACGAGTGTGTTACCTGTGGCAGCTGCGCGCTCTTTGTGCTGGTGGCTCCAGCTGC  
GCCTACCAGGTGTGCGGGCCCGCTGTACCAGCTCGGCGTGCACCTCAGGCCGGCCCCGCCACACGCTAGTGGACCCCG  
AAGGCGTCTGGGATGCGAACGGGCTGGAACATAGCGTCAAGGAGCGCGGGTCCCCCTGGGCTGCCAGCCCCGGTGC  
GGAGGCGGGGGCAGTGCCAGCCGAAGTCTGCCGTTGCCAAGAGGCCAGGCGTGGCGCTGCCCTGAGCCGGAGCCGAC  
CCCGTTGGGACAGGGTCTGGGCCACCCGGGACGCGTGGACCGAGTGACCGTGGTTCTGTGTGGTGTACCTGCCAG  
ACCCGCCGAAGAAGCCACCTCTTTGGAGGGTGCCTCTCTGGCAGCGCCACTCCACCCATCCGTGGGCCGCCAGCACCG  
CGGGCCCCCATCCACATCGCGGCCACCAGTCCCTGGGACACGCTTGTCCCCGGTGTACGCCGAGACCAAGCACTTCCT  
TACTCTCAGCGACAAGGAGCAGCTGCGGCCCTCTTCTACTCAGCTCTCTGAGGCCAGCCTGACTGGCGCTCGGAGGCT  
CGTGGAGACCATCTTTCTGGGTTCCAGGCCCTGGATGCCAGGACTCCCGCAGGTTGCCCGCCTGCCACAGGCTACTGGC  
AAATGCGGCCCTGTTCTTGAGCTGCTGGGAACCACGCGAGTCCCCTACGGGGTGTCTCAAGACGCACTGCCCGCTG  
CGAGCTGCGGTACCCAGCAGCCGGTGTCTGTGCCCGGAGAAGCCCCAGGGTCTGTGGCGCCCCGAGGAGGAGACAC  
AGACCCCGCTGCCTGGTGCAGCTGCTCCGCCAGCACAGCAGCCCTGGCAGGTGTACGGCTTCGTGCGGGCTGCCTGCGCC  
GGCTGGTGCCCCAGGCTCTGGGGCTCCAGGCACAACGAACCGCGTCTCTCAGGAACACCAAGAAGTTCATCTCCCTGGGG  
AAGCATGCCAAGTCTCGCTGCAGGAGCTGACGTGGAAGATGAGCGTGCGGACTGCGCTTGGCTGCGCAGGAGCCAGGGT  
TGGCTGTGTTCCGGCCGAGAGCACCGTCTGCGTGAGGAGATCTGGCCAAGTCTCTGCACTGGCTGATGAGTGTGTACGTCG  
TCGAGCTGCTCAGGCTTTCTTTATGTACGGAGACCAGTTCAAAAGAAGAGGCTCTTTTCTACCGAAGAGTGTCTGG  
AGCAAGTTGCAAAGCATTGGAATCAGACAGCACTGAAGAGGGTGCAGCTGCGGGAGCTGTCGGAAGCAGAGGTCAGGAGCA  
TCGGGAAGCCAGGCCCGCTGTGACGTCCAGACTCCGCTTATCCCAAGCTGACGGGCTGCGGCCGATTGTGAACATGG  
ACTACGTGCTGGGAGCCAGAAGTTCGCGAGAGAAAAGGGCCGAGCGTCTCAGGAGGGTGAAGGCACTGTTCAGCGT  
CTCAACTACGAGCGGGCGCGGCCCCCGCCTCTGGGCGCTCTGTGCTGGGCTGGACGATATCCACAGGGCTGGCGCAC  
CTTCGTGCTGCTGTGCGGGCCAGGACCCGCGCTGAGCTGTACTTTGTCAAGGTGGATGTGACGGGCGGTACGACACCA  
TCCCCAGGACAGGCTCAGGAGGTCATCGCCAGCATCATAAACCCAGAACAGTACTGCGTGCCTCGGTATGCCGTGGT  
CAGAAGGCCGCCATGGGACGTCGCAAGGCCTCAAGAGCCAGTCTCTACCTTGACAGACCTCCAGCCGTACATGCGACA  
GTTCTGGTCACTGCAGGAGACCAGCCGCTGAGGGATGCCGTGTCATCGAGCAGAGCTCCTCCCTGAATGAGGCCAGCA  
GTGGCTCTTCGACGCTTCTCCTACGCTTATGTGCCACCACGCGTGCATCAGGGGCAAGTCTACGTCCAGTGCAGGGG  
ATCCCGCAGGGCTCCATCTCTCCAGCTGCTCTGACGCTGTGCTACGCGCATGGAGAACAAGCTGTTTGCGGGATTG  
GCGGACAGGGTGTCTCTGCGTTTGGTGGATGATTCTTGTGTTGGTGACACCTCACCTACCCACGCGAAAACCTTCTCAGGA  
CCCTGGTCCGAGGTGCCCTGAGTATGGCTGCGTGGTGAAGTTCGCGAAGACAGTGGTGAAGTCCCTGTAGAAGACGAGGCC  
CTGGGTGGCAGGCTTTTGTTCAGATGCCGGCCACGGCTATTCCCTGGTGGCGCTGCTGTGGATACCCGACCTGGA  
GGTGCAGAGCGACTACTCCAGCTATGCCCGGACCTCCATCAGAGCCAGTCTCACCTTCAACCGCGCTTCAAGGCTGGGAGGA  
ACATGCGTCGCAAACTCTTTGGGGTCTTGGCGTGAAGTGTACAGCCTGTTTCTGGATTGTCAGGTGAACAGCCTCCAGACG  
GTGTGCACCAACATCTACAAGATCCTCCTGCTGCAGGCGTACAGGTTTACGCATGTGTGCTGCAGCTCCATTTTCATCAGCA  
AGTTTGAAGAACCCACATTTTCTGCGCGTATCTCTGACACGGCTCCCTCTGCTACTCCATCTGAAAGCCAAGAACG  
CAGGATGTGCTGGGGCAAGGGCGCCGCGCCCTCTGCCCTCCGAGGCCGTGAGTGGCTGTGCCACCAAGCATTCCTG  
CTCAAGCTGACTCGACACCGTGTACCTACGTGCCACTCTGGGGTCACTCAGGACAGCCAGACGAGCTGAGTCCGGAAGCT  
CCCGGGACGAGCTGACTGCCCTGGAGCCGAGCCAACCCGGCACTGCCCTCAGACTCAAGACCATCCTGGACTGA

**Amino Acid Sequence:**

MPRAPRCRAVRSLLRSHYREVLPLATFVRRLLGPQGWRLVQRGDPAAFRLVAQCLVCPWDARPPPAAPSFQVQSCLKELVAR  
VLQRLCERGAKNVLAFGFALLDGARGPPEAFTTSVRSYLPNTVTDALRSGAWGLLLRRVGDVVLHLLARCALFVLVAPSC  
AYQVCGPPLYQLGAATQARPPPHASGPRRRLGCERAWNHSVREAGVPLGLPAPGARRRGGASRSRSLPLPKRPRRGAPEPERT  
PVGQGSWAHPGRTRGSPDRGFCVSPARPAEEATSLEGLSGTRHSHPSVGRQHHAAGPPSTSRPPRPWDTPCPPVYAEKHF  
YSSGDKQLRPSFLLSSLRPSLTGARRLVETIFLGSRPWMPGTPRRLPRLPQRYWQMRPLFLELLGNHAQCPYGVLLKTHCPL  
RAAVTPAAGVCAREKPPQGSVAPEEEDTPRRLVQLLRQHSSPWQVYGFVRACLRRLVPPGLWGRHNRERRFLRNTKKFISLG  
KHAKLSLQELTWKMSVRDCAWLRSPGVCVPAEHLRREEILAKFLHWMVYVVELLRSFFYVTTETTFQKNRLLFFYRKS  
SKLQSIGIRQHLKRVQLRELSAEVQRHREARALLTSRLRFIPKPDGLRPIVNMDYVVGARTFRREKRAERLTSRVKALFV  
LNYERARRPGLGASVGLDDIHRARWTFVLRVRAQDPPPELYFVKVDVTGAYDTIPQDRLTEVIAIKPQNTYCVRRYAVV  
QKAAHGHVRKAFKSHVSTLTDLQPYMRQFVAHLQETSPLRDAVVEIQSSSLNEASSGLFDVFLRFMCHHAVRIRGKSYVQCQ  
IPQGSILSTLLCSLCYGMENKLFAGIRRDGLLLRLVDDFLLVTPHLTHAKTFLRLTVRGGVPEYGCVVNLRKTVVNFVDE  
LGGTAFVQMPAHGLFPWCGLLLDTRTLEVQSDYSYARTSIRASLTFNRGFKAGRNMRRKLFGLRLKCHSLFDLQVNSLQT

VCTNIYKILLQAYRFHACVLQLPFHQVWKNPTFFLRVISDTASLCYSILKAKNAGMSLGAKGAAGPLPSEAVQWLCHQAF  
LKLTRHRVTYVPLGSLRTAQTQLSRKLPGTTLTALEAAAANPALPSDFKTILD
